# Supplementary material
Source: PubMed Central journal article supplement (PMC7979475)
Supplement: NIHMS1658012-supplement-1.pdf [file NIHMS1658012-supplement-1.pdf]

| Antibody                                                                                   | Dilution                            |
|--------------------------------------------------------------------------------------------|-------------------------------------|
| anti-mouse Ki67, Alexa Fluor 488, Clone B56, Cat 558616, Lot 9123835, BD                   | 1/100                               |
| anti-mouse TCR D011.10 FITC, Clone KJ1-26, Cat 118506, Lot B192696, Biolegend              | 1/200                               |
| anti-mouse CD62L PECY7, Clone MEL-14, Cat 104418, Lot B269976, Biolegend                   | 1/200                               |
| anti-mouse CD4 BUV395; Clone GK1.5, Cat 563790, Lot 92755330, BD                           | 1/200                               |
| anti-mouse Bcl6 PE, Clone K112 91, Cat 561522, Lot 8233984, BD                             | 1/100                               |
| anti mouse CD45.1 APC, Clone A20, Cat 17-0454-82, Lot 4339672, eBioscience                 | 1/100                               |
| anti-mouse Vβ 5.1, 5.2 T-Cell Receptor PE, Cat 553190, Lot 8345781, BD                     | 1/200                               |
| Biotin Rat anti-mouse CD185 (CXCR5), Cat 145510, Lot B21465, BD                            | 1/100                               |
| anti-mouse CD44 APC, Clone IM7, Cat 563058, Lot B265921, BD                                | 1/200                               |
| anti-mouse Ki-67 FITC, Clone B56, Cat 558616, Lot 9123835, Biolegend                       | 1/100                               |
| anti-mouse Ki-67 PE, Clone 16A8, Cat 652403, Biolegend                                     | 1/100                               |
| anti-mouse CD4, Clone RM4-5, Cat 100516, Lot B277608, Biolegend                            | 1/200                               |
| anti-mouse CD69 Pacific Blue, Clone H1.2F3, Cat 104524, Lot B287574, Biolegend             | 1/200                               |
| anti mouse CD69-FITC, Clone H1.2F3, Cat 104506, Lot E031177, Biolegend                     | 1/200                               |
| anti-CD45.2 Mouse Monoclonal Antibody PE, Clone 104, Cat 109808, Lot B271929, Biolegend    | 1/200                               |
| anti-mouse CD185 (CXCR5) BViolet 421™, Clone L138D7, Cat 145512, Lot B265666, Biolegend    | 1/100                               |
| anti-mouse TCR Vα2, Clone B20.1, Cat 127807, Lot B245807, Biolegend                        | 1/200                               |
| anti-CD45.1 Mouse Monoclonal Antibody 110738 Biolegend                                     | 1/200                               |
| anti-mouse/human CD44 Brilliant Violet 421™, Clone IM7, Cat 103040, Lot B273304, Biolegend | 1/200                               |
| anti CD44, Clone IM7, Cat 11-0441-82, eBioscience                                          | 1/200                               |
| anti-mouse CD43 PE Antibody, Clone S7, Cat 553271, Lot 7297616, Biolegend                  | 1/200                               |
| anti-mouse CD4 APC, Cat 100516, Lot B277608, Biolegend                                     | 1/200                               |
| anti-mouse TCR DO11.10, Clone KJ1-26, Cat 118508, Lot B192696, Biolegend                   | 1/200                               |
| anti-mouse CD38, Clone 90/CD38, Cat 553764, BD Bioscience                                  | 1/100                               |
| anti-mouse PD1 PE, Clone J43, Cat 551892, Lot 7086579, BD Bioscience                       | 1/200                               |
| anti-mouse CD4 PE, Clone GK1.5, Cat 100408, Lot B266388, Biolegend                         | 1/200                               |
| anti-mouse CD45.2, Clone 104, Cat 109808, Lot B271929, eBioscience                         | 1/200                               |
| anti-mouse TCR VB5.1, Clone MR9-4, Cat 139504, Biolegend                                   | 1/200                               |
| anti-mouse CD44, Clone IM7, Cat 103027, Biolegend                                          | 1/200                               |
| anti-mouse PD1- BV711, Clone 29F.1A12, Cat 135231, Lot B298663, Biolegend                  | 1/200                               |
| anti-mouse GL7 PB, Clone GL7, Cat 144614, Lot B306510, Biolegend                           | 1/200                               |
| anti-mouse GL7 FITC, Clone GL7, Cat 144603, Biolegend                                      | 1/200                               |
| anti-mouse CD44 BV605, Clone IM7, Cat 563058, BD                                           | 1/200                               |
| anti-NK-1.1 Mouse Monoclonal Antibody PE, Clone PK136, Cat 557391, Lot 65616, Biolegend    | 1/200                               |
| anti-mouse CD38 Pacific Blue, Clone T10, Cat 102719, Biolegend                             | 1/100                               |
| anti-mouse/human PE CD45R/B220 Antibody, Clone RA3-6B2, Cat 103208, Biolegend              | 1/200                               |
| anti-mouse CD86 APC, Clone GL-1, Cat 4332810, Biolegend                                    | 1/100                               |
| anti-mouse CD279 APC, Clone 29F.1A12, Cat 109112, Lot B248540, Biolegend                   | 1/200                               |
| anti-mouse Active Caspase, Clone C92-605, Cat 561011, Lot 4318875, BD                      | 1/100                               |
| B-Phycoerythrin, Cat AS-82001, Lot 164-119, Anaspec                                        | 50ul of 4mg/ml B-PE in 150ul of PBS |
| Anti-B-Phycoerythrin Rabbit, Number 100-4199, Rockland                                     | 100ug of 10mg/ml                    |
| DAPI solution, Cat 564907, Lot 9294998                                                     | 10ug/ml                             |
| anti-mouse CD45.1 PE/Cyanine7, Clone A20, Cat 110729, Biolegend                            | 1/200                               |
| TotalSeq™-C0301 anti-mouse Hashtag 1 Antibody 155861, Biolegend                            | 1 µg                                |
| TotalSeq™-C0301 anti-mouse Hashtag 1 Antibody 155861, Biolegend                            | 1 µg                                |
| TotalSeq™-C0302 anti-mouse Hashtag 2 Antibody 155863, Biolegend                            | 1 µg                                |
| TotalSeq™-C0303 anti-mouse Hashtag 3 Antibody 155865, Biolegend                            | 1 µg                                |
| TotalSeq™-C0304 anti-mouse Hashtag 4 Antibody 155867, Biolegend                            | 1 µg                                |
| TotalSeq™-C0305 anti-mouse Hashtag 5 Antibody 155869, Biolegend                            | 1 µg                                |
